# Supplementary material for: Unleashing ultra-fast sodium ion storage mechanisms in interface-engineered monolayer MoS2/C interoverlapped superstructure with robust charge transfer networks
Source: Royal Society of Chemistry journal article supplement (doi:10.1039/d0ta04916f), 2020-01-01
Supplement: d0ta04916f1.pdf [file d0ta04916f1.pdf]

Supporting Information for

**Unleashing the Ultra-fast Sodium Ion Storage Mechanisms in  
Interface-engineered Monolayer MoS<sub>2</sub>/C Interoverlapped  
Superstructure with Robust Charge Transfer Networks**

Lili Wang<sup>b</sup>, Haitao Zhang<sup>\*a</sup>, Yanlei Wang<sup>a</sup>, Cheng Qian<sup>a</sup>, Qiang Dong<sup>b</sup>, Chonghai

Deng<sup>b</sup>, Danfeng Jiang<sup>a</sup>, Mengyao Shu<sup>b</sup>, Shanshan Pan<sup>a</sup>, Suojiang Zhang<sup>\*a</sup>

<sup>a</sup> *Beijing Key Laboratory of Ionic Liquids Clean Process, CAS Key Laboratory of Green Process and Engineering, Institute of Process Engineering, Chinese Academy of Sciences, Beijing 100190, P. R. China.*

<sup>b</sup> *School of Energy, Materials and Chemical Engineering, Hefei University, Hefei, Anhui 230601, P. R. China*

\* Corresponding author. Tel.: +86-10-62558174; Fax: +8610-82544875.

E-mail address: [htzhang@ipe.ac.cn](mailto:htzhang@ipe.ac.cn); [sjzhang@ipe.ac.cn](mailto:sjzhang@ipe.ac.cn)

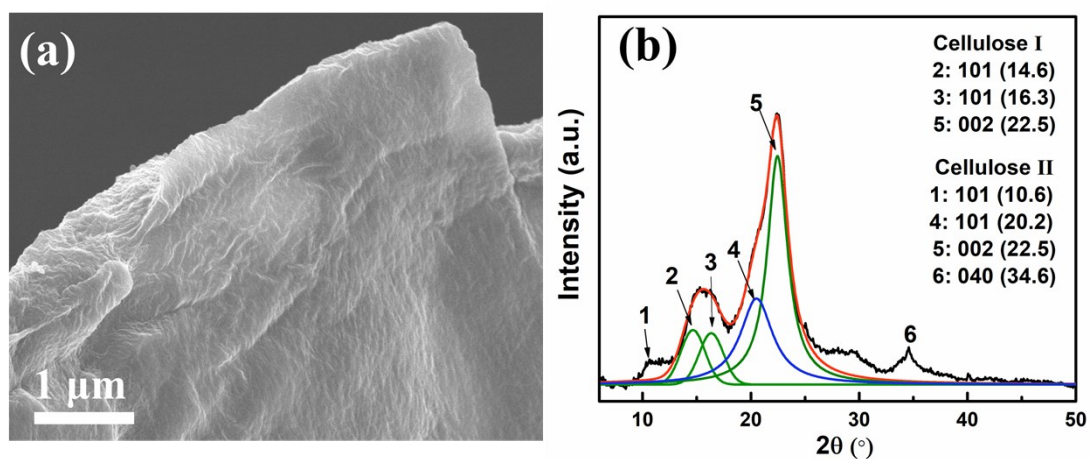

**Fig. S1.** (a) SEM image and (b) XRD patterns of colloidal bagasse cellulose sheets.

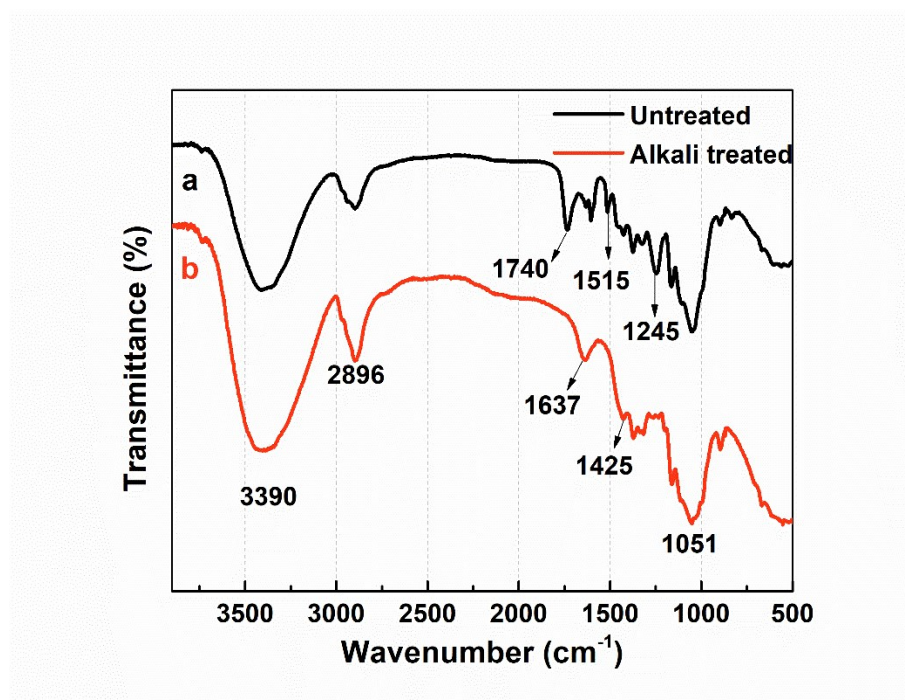

**Fig. S2.** FTIR spectra of colloidal bagasse cellulose sheets.

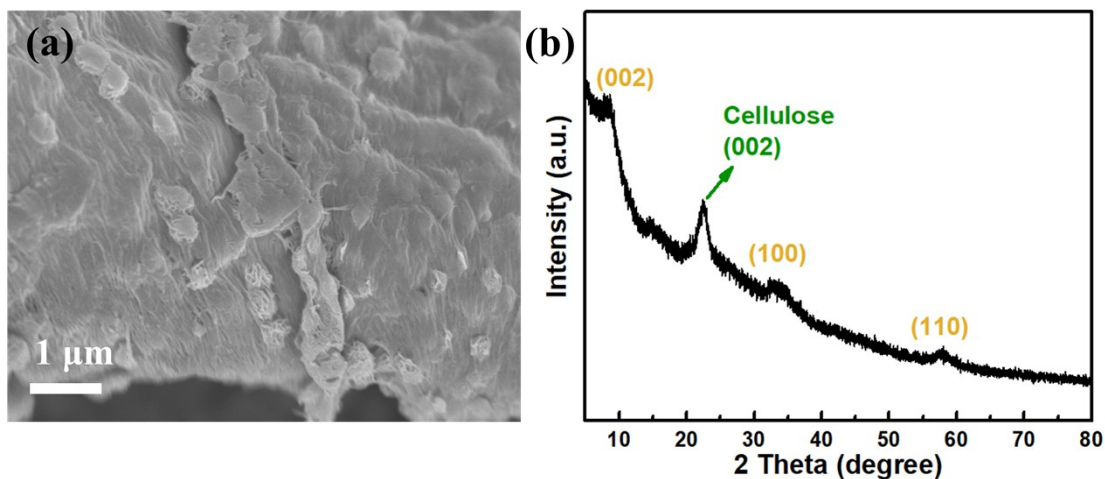

**Fig. S3.** (a) SEM image and (b) XRD patterns of  $\text{MoS}_2$ /carbohydrate nanoflowers embedded in the colloidal bagasse sheets ( $\text{MoS}_2$ /carbohydrate-CBS).

As shown in Fig. S3b, the diffraction peaks at  $22.6^\circ$  is ascribed to (002) planes of cellulose. The diffraction peaks at  $32.6^\circ$  and  $57.7^\circ$  can be indexed to (100) and (110) planes of 2H- $\text{MoS}_2$  (JCPDS card No. 06-0097), respectively. The new peaks at  $8.6^\circ$  ( $d = 1.02 \text{ nm}$ ) is ascribed to (002) plane. Compared to pristine 2H- $\text{MoS}_2$ , the expanded interlayer is probably caused by the insertion of carbohydrate molecules into the adjacent  $\text{MoS}_2$  monolayers.

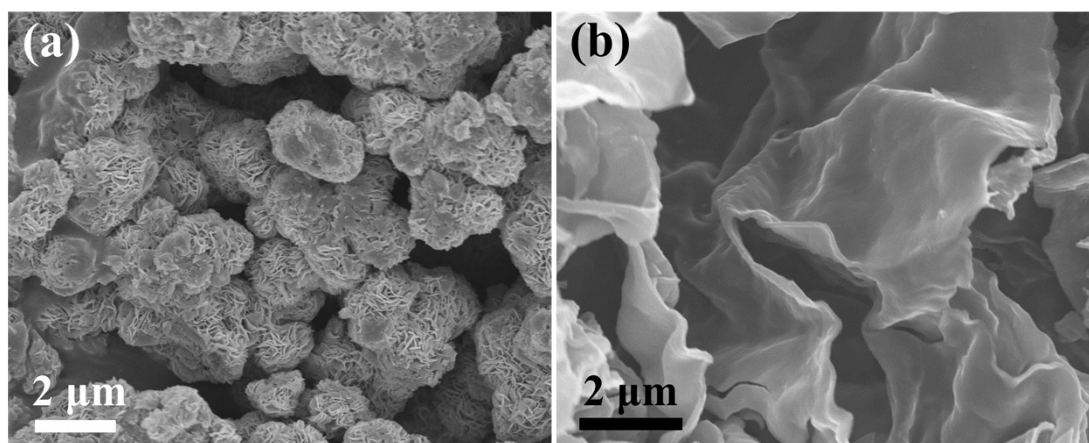

**Fig. S4.** SEM images of (a) the pristine  $\text{MoS}_2$  and (b) the pristine carbon.

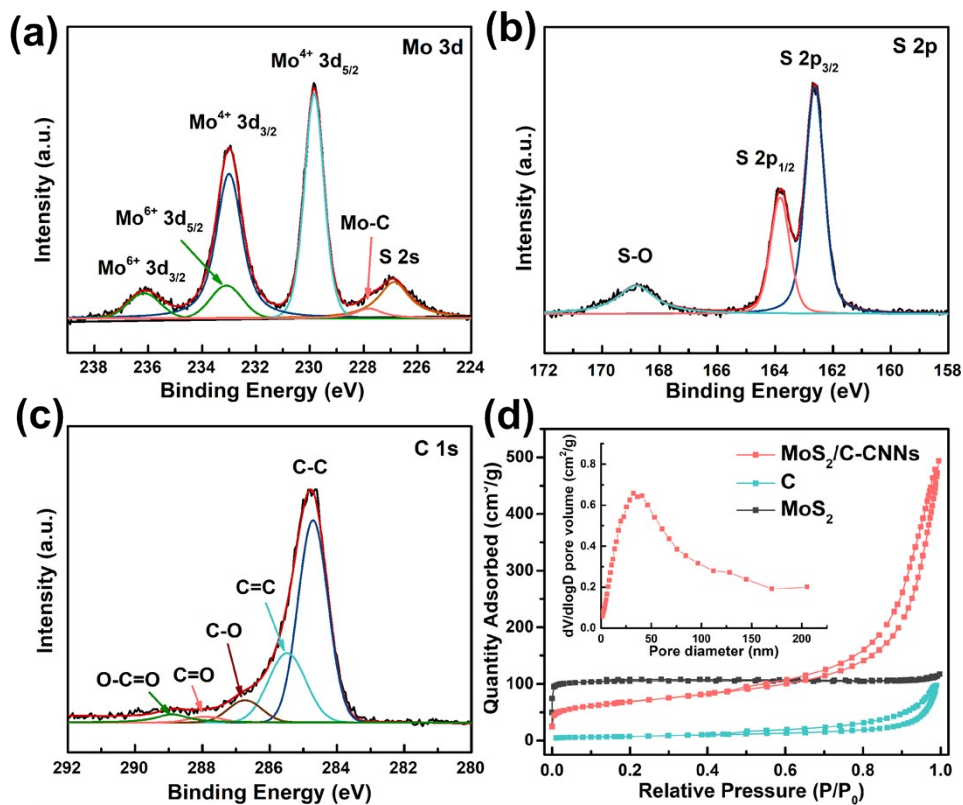

**Fig. S5.** (a-c) High-resolution XPS spectra of Mo 3d, S 2p and C 1s core level of MoS<sub>2</sub>/C-CNNs; (d) N<sub>2</sub> adsorption-desorption isotherms of the MoS<sub>2</sub>/C-CNNs, bulk MoS<sub>2</sub> and pure C samples, and inset is the corresponding pore size distribution of MoS<sub>2</sub>/C-CNNs.

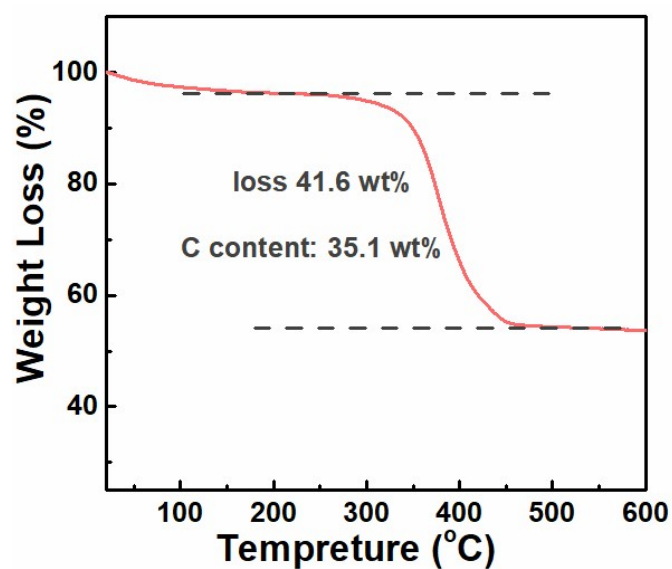

**Fig. S6.** TGA measurement of MoS<sub>2</sub>/C-CNNs.

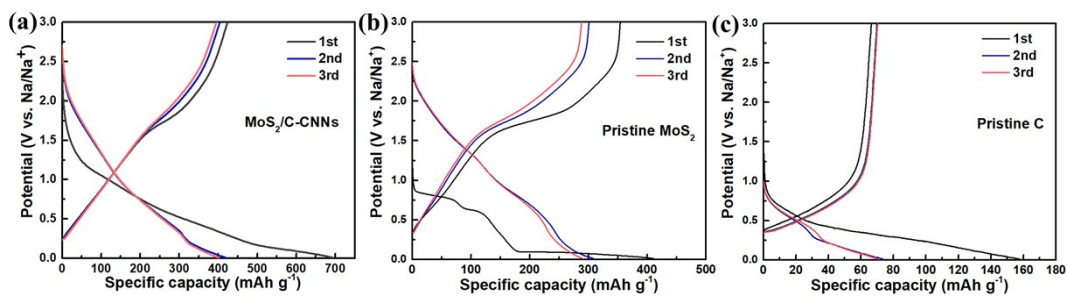

**Fig. S7.** The first three charge/discharge voltage profiles of (a) the MoS<sub>2</sub>/C-CNNs, (b) the pristine MoS<sub>2</sub> and (c) the pristine C electrode at 200 mA g<sup>-1</sup> between 0.01 and 3.0 V.

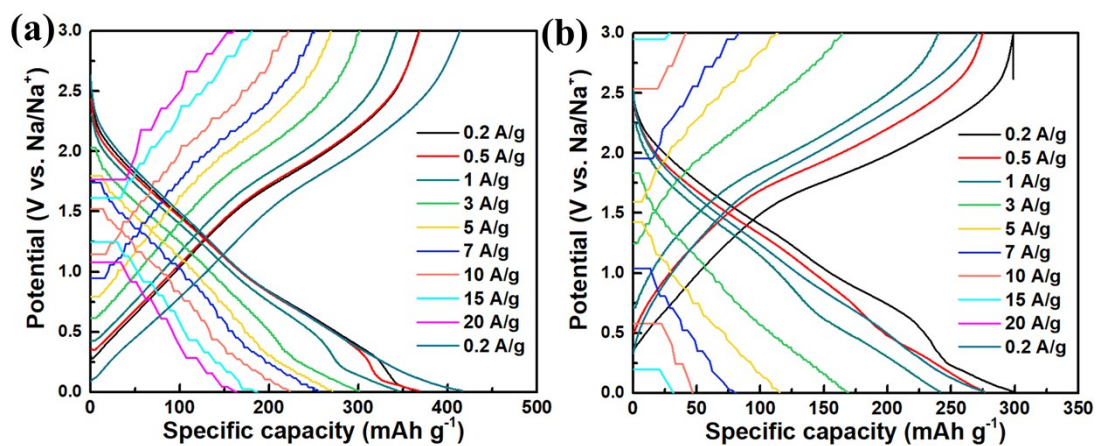

**Fig. S8.** The charge/discharge voltage profiles of (a) the MoS<sub>2</sub>/C-CNNs electrode and (b) the pristine MoS<sub>2</sub> electrode at different current densities.

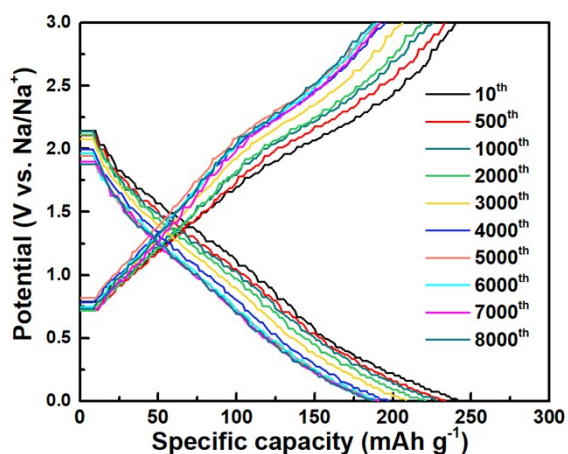

**Fig. S9.** The charge/discharge voltage profiles of the MoS<sub>2</sub>/C-CNNs electrode at different cycles under 5 A g<sup>-1</sup>.

**Table S1.** Electrochemical performances of previously reported MoS<sub>2</sub>-based SIB anodes in comparison with our MoS<sub>2</sub>/C-CNNs

| Materials                              | Cycling data             | Rate capability                      | reference                             |
|----------------------------------------|--------------------------|--------------------------------------|---------------------------------------|
| MoS <sub>2</sub> nanosheets            | 267/125th@1A/g           | 226@5A/g                             | ACS Nano, 13 (2019), 5533-5540.       |
| MoS <sub>2</sub> nanosheets            | 324/200th@1A/g           | 253@2A/g                             | Nano Energy 61 (2019) 361-369.        |
| MoS <sub>2</sub> /C hollow nanospheres | 262/600th@2A/g           | 211@10A/g                            | Nano Energy 51 (2018) 546-555.        |
| MoS <sub>2</sub> @carbon nanospheres   | 150.2/300th@5A/g         | 204@5A/g                             | Nano Energy 62 (2019) 299-309.        |
| MoS <sub>2</sub> @carbon nanowall      | 265/1000th@1A/g          | 235@2A/g                             | Adv. Funct. Mater. 27 (2017) 1702116. |
| MoS <sub>2</sub> /carbon framework     | 360/100th@0.1A/g         | 171@5A/g                             | Nano Energy 48 (2018) 526-535.        |
| MoS <sub>2</sub> /N-Graphene           | 245/1300th@1A/g          | 153@20A/g                            | Adv. Energy Mater. 2018, 8, 1703300   |
| PCNF@MoS <sub>2</sub> @PEDOT           | 410/1000th@2A/g          | 313@20A/g                            | Energy Storage Mater. 2020, 25, 114   |
| MoS <sub>2</sub> /carbon framework     | 183.5/3000th@2A/g        | ~195@15A/g                           | J. Mater. Chem. A, 2018, 6, 14742     |
| <b>MoS<sub>2</sub>/C-CNNs</b>          | <b>193.5/8000th@5A/g</b> | <b>223@10A/g</b><br><b>159@20A/g</b> | <b>Our work</b>                       |



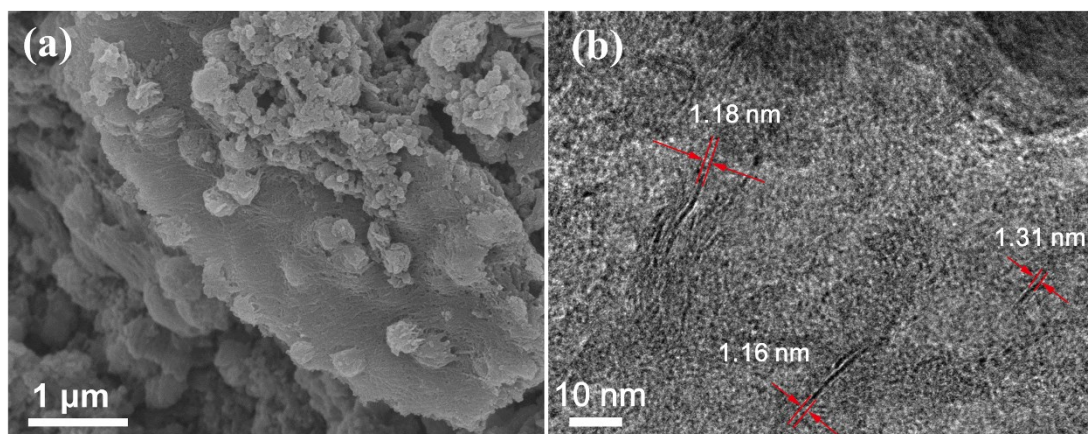

**Fig. S10.** (a) SEM image of MoS<sub>2</sub>/C-CNNs electrode after 1000 cycles; (b) HRTEM image of MoS<sub>2</sub>/C-CNNs electrode after 5 cycles.

**Table S2.** EIS fitting results of pristine MoS<sub>2</sub> and MoS<sub>2</sub>/C-CNNs.

|                                                   | $R_s/\Omega$ | $R_f/\Omega$ | $R_{ct}/\Omega$ | $Z_w-R/\Omega$ |
|---------------------------------------------------|--------------|--------------|-----------------|----------------|
| Pristine MoS <sub>2</sub> after 10 <sup>th</sup>  | 6.01         | 6.13         | 256.8           | 454            |
| MoS <sub>2</sub> /C-CNNs after 10 <sup>th</sup>   | 5.39         | 15.42        | 50.70           | 88.3           |
| MoS <sub>2</sub> /C-CNNs after 1000 <sup>th</sup> | 6.71         | 12.01        | 50.46           | 90.0           |
| MoS <sub>2</sub> /C-CNNs after 2000 <sup>th</sup> | 6.91         | 15.29        | 43.23           | 129.3          |
| MoS <sub>2</sub> /C-CNNs after 4000 <sup>th</sup> | 6.52         | 22.71        | 37.92           | 133.4          |
| MoS <sub>2</sub> /C-CNNs after 6000 <sup>th</sup> | 5.97         | 26.77        | 35.24           | 111.7          |

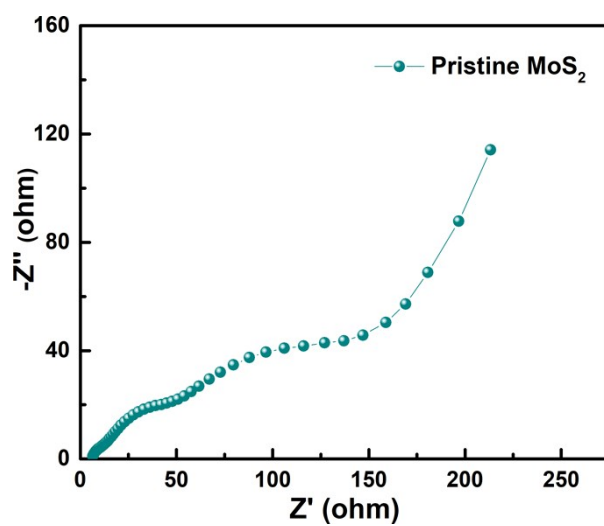

**Fig. S11.** Nyquist plots of pristine MoS<sub>2</sub> electrode after the 10th circles.



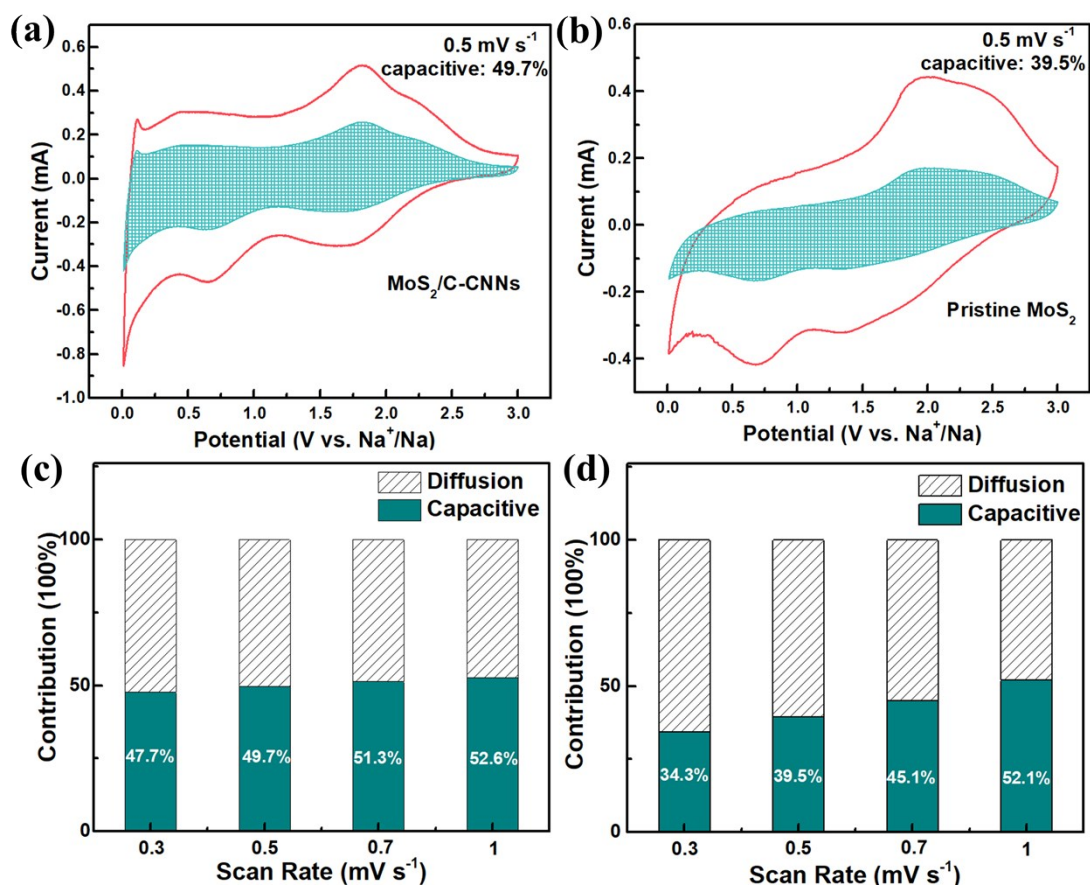

Fig. S12. Separation of the capacitive and diffusion currents in the MoS<sub>2</sub>/C-CNNs (a) and the MoS<sub>2</sub> (b) at a scan rate of 0.5 mV s<sup>-1</sup>, respectively; contribution ratio of the capacitive charge versus scan rate of the MoS<sub>2</sub>/C-CNNs (c) and the MoS<sub>2</sub> (d).

The capacitive effect and the diffusion-controlled Na<sup>+</sup> intercalation effects to the sodium storage can be expressed by the equation (Energy Storage Mater., 2018, 14, 129-135):  $i(V) = k_1v + k_2v^{1/2}$ .

$i(V)$  corresponds to the current value at the voltages,  $v$  refers to the scan rate,  $k_1v$  refers to the contribution of the capacitive effect provided by the surface-adsorbing charge and  $k_2v^{1/2}$  refers to the solid diffusion control with intercalated/de-intercalated charges.

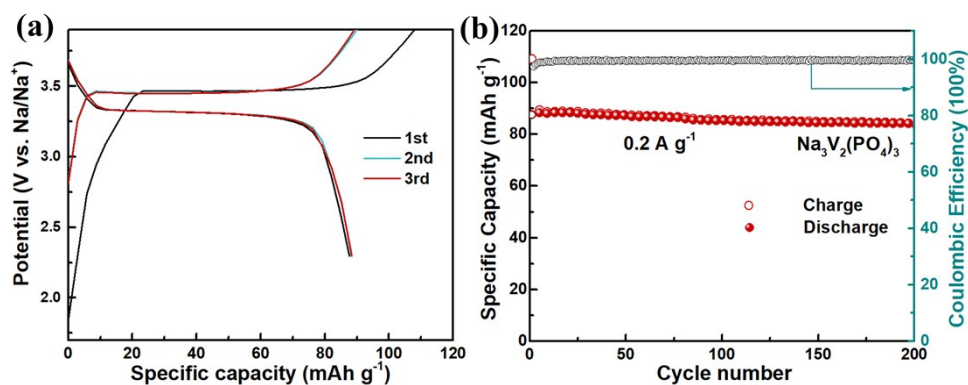

**Fig. S13.** (a) The first three charge/discharge voltage profiles of the  $\text{Na}_3\text{V}_2(\text{PO}_4)_3$  at  $0.2 \text{ A g}^{-1}$  between 2.3 and 3.9 V; (b) Cycling performance/Coulombic efficiency of the  $\text{Na}_3\text{V}_2(\text{PO}_4)_3$  at  $0.2 \text{ A g}^{-1}$ .

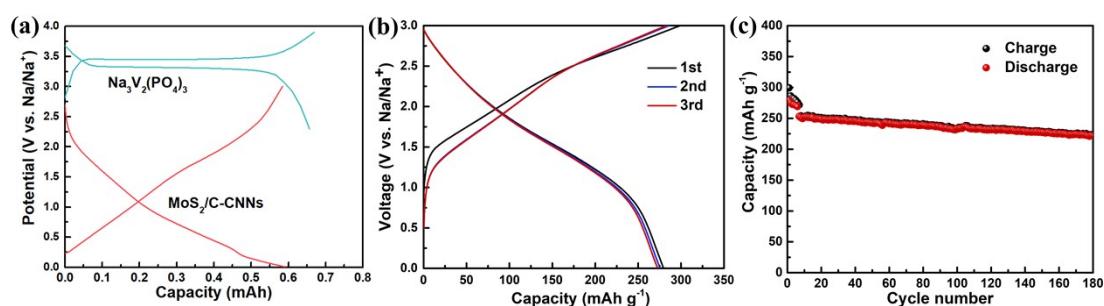

**Fig. S14.** (a) Charge-discharge profiles of  $\text{MoS}_2/\text{C-CNNs}$  and  $\text{Na}_3\text{V}_2(\text{PO}_4)_3$  half cells at a current density of  $0.2 \text{ A g}^{-1}$ ; (b) The charge and discharge profiles of a full-cell at  $0.2 \text{ A g}^{-1}$  according to the mass of anode materials; (c) Cycling performance of one full-cell at  $1 \text{ A g}^{-1}$  after first 7 cycles of low current density ( $0.2 \text{ A g}^{-1}$ ).
